# Supplementary material for: Tandem ethylene oligomerisation and Friedel–Crafts alkylation of toluene catalysed by bis-(3,5-dimethylpyrazol-1-ylmethyl)benzene nickel(ii) complexes and ethylaluminium dichloride
Source: Royal Society of Chemistry journal article supplement (doi:10.1039/c3cy00334e), 2013-01-01
Supplement: c3cy00334e.pdf [file c3cy00334e.pdf]

## Supplementary materials

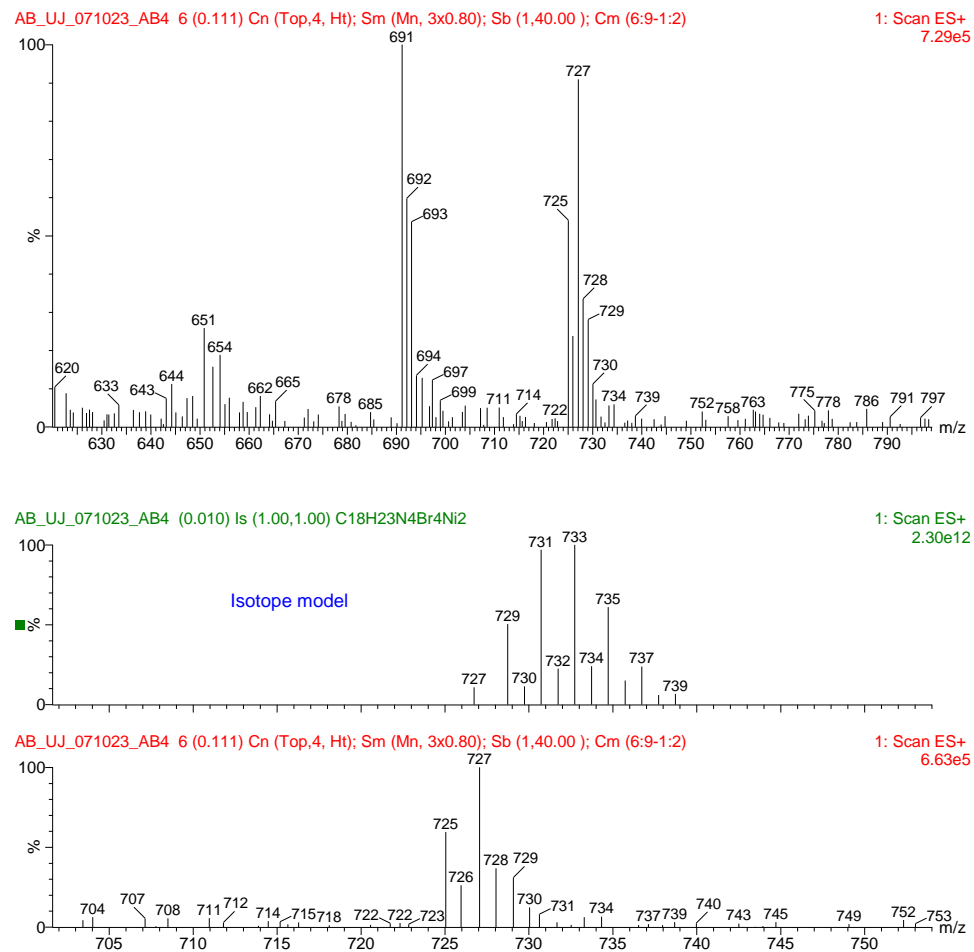

Figure S1: Parts of the mass spectrum of complex **5**, depicting the polymeric nature of this compound.

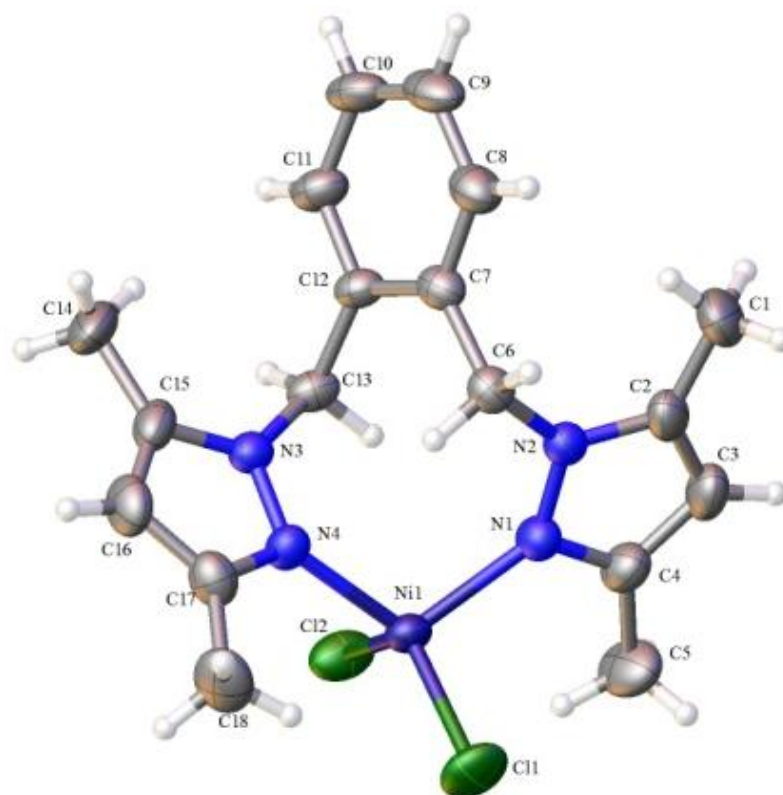

Figure S2: Molecular structure of complex **2**, with the ellipsoids drawn at 50% probability level. Selected bond lengths [ $\text{\AA}$ ] and angles [ $^\circ$ ]: N(1)-Ni(1), 2.019(2); N(4)-Ni(1), 2.003(2); Cl(1)-Ni(1), 2.2169(8); Cl(2)-Ni(1), 2.2569(7); N(3)-N(4), 1.372(3); N(1)-Ni(1)-N(4), 109.26(8); N(1)-Ni(1)-Cl(1), 102.01(7); N(4)-Ni(1)-Cl(1), 118.63(6); N(1)-Ni(1)-Cl(2), 105.86(7); N(4)-Ni(1)-Cl(2), 98.76(6); Cl(1)-Ni(1)-Cl(2), 121.60(3).

Abundance

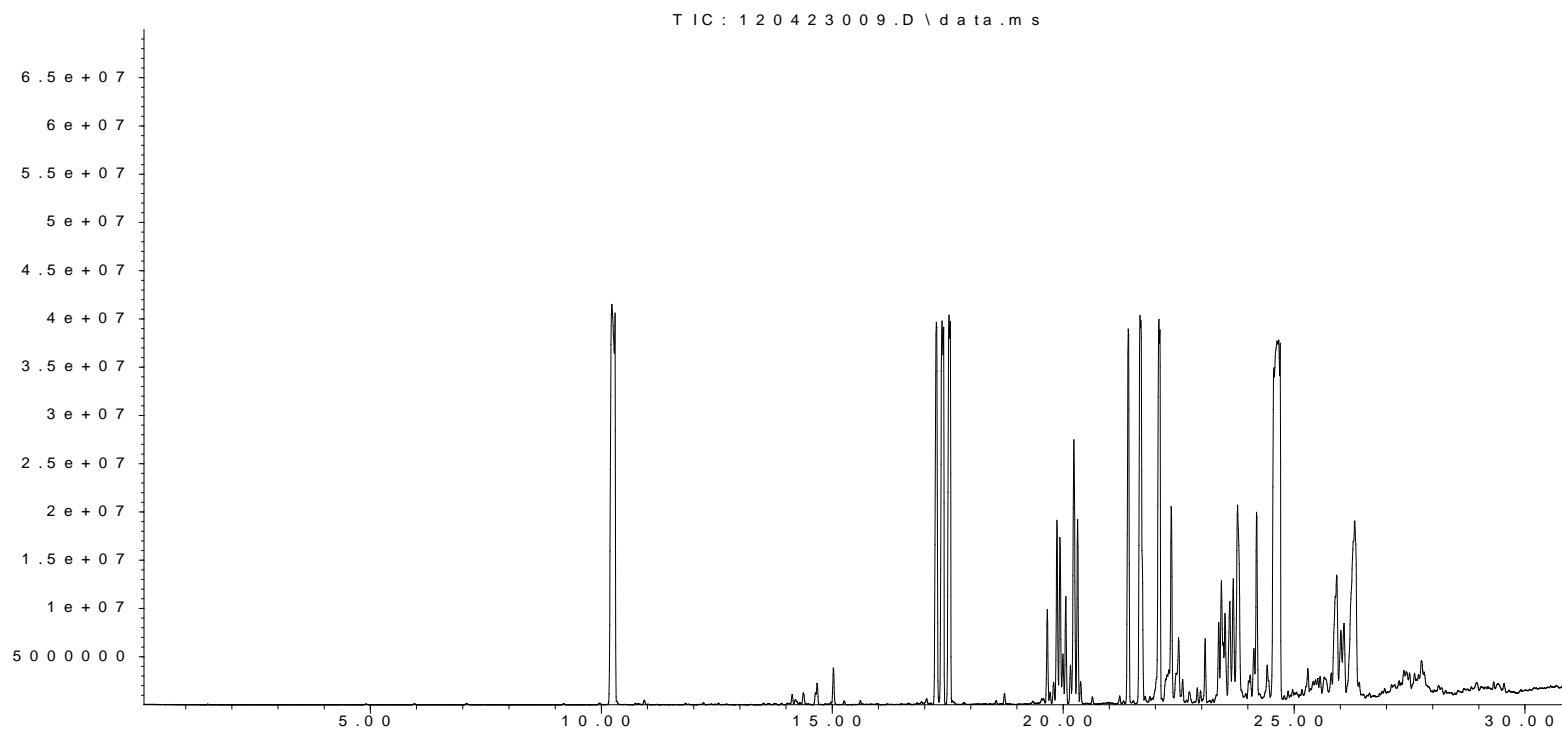

Time -->

Figure S3: Total ion chromatogram showing C4-, C8-, and C12- toluenes as major products. Thus addition of butene may be the most facile process which leads to alkyltoluenes.

(A)

(i) Toluene + C<sub>2</sub>

(MW = 120)

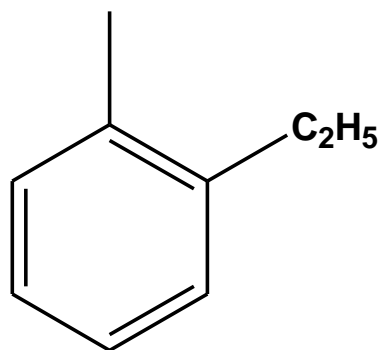

**2-ethyltoluene**

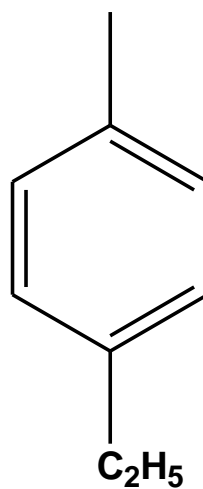

**4-ethyltoluene**

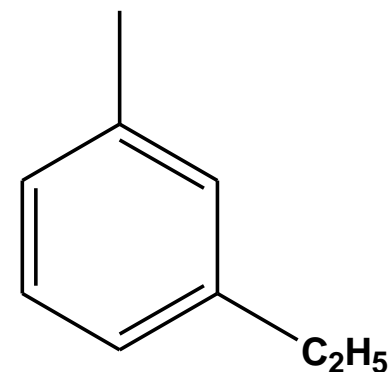

**3-ethyltoluene**

Figure S4: Retention time = 15 min

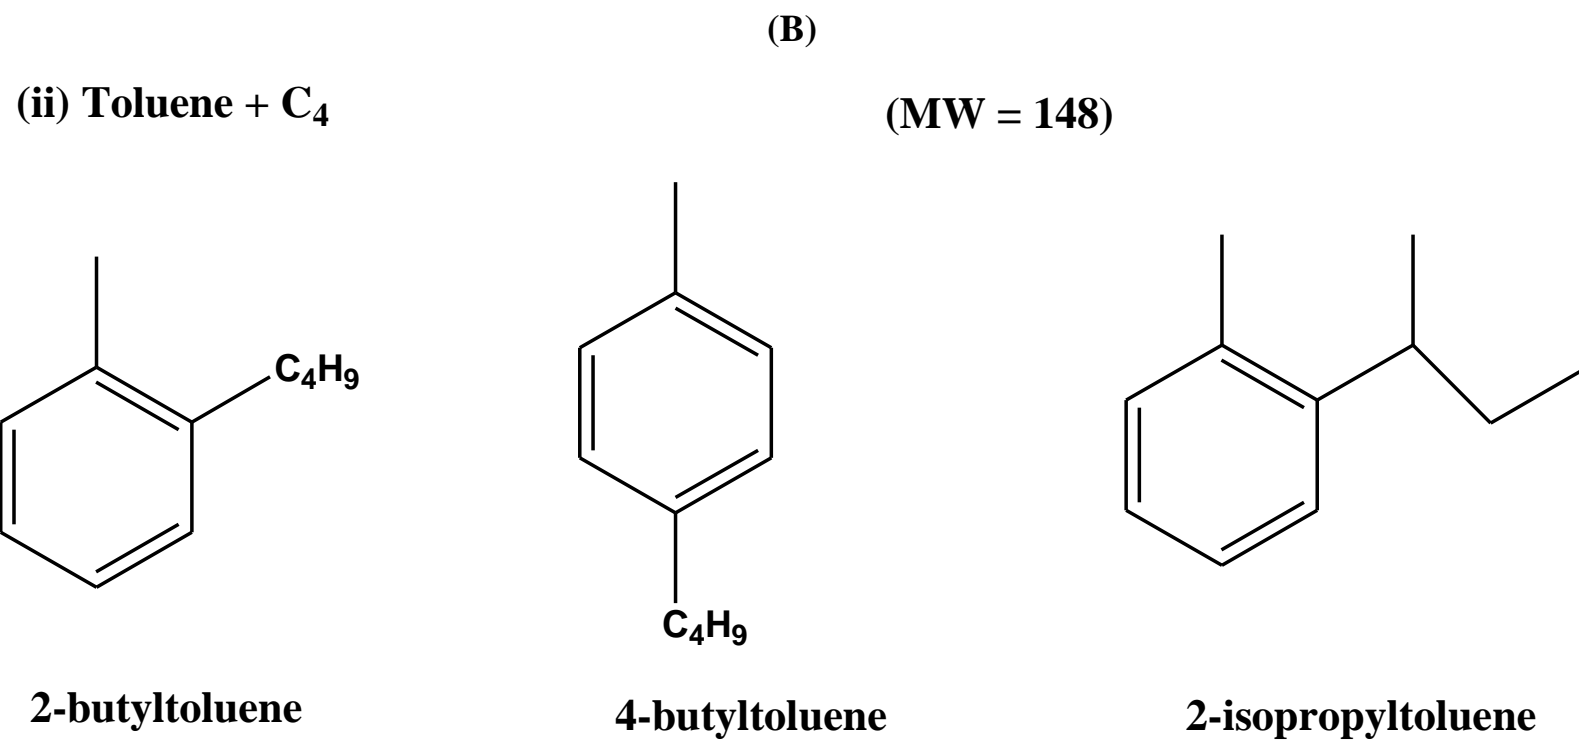

Figure S5: Retention time = 17.00 – 18.00 min

(C)

**(iii) Toluene + C<sub>6</sub>**

**(MW = 176)**

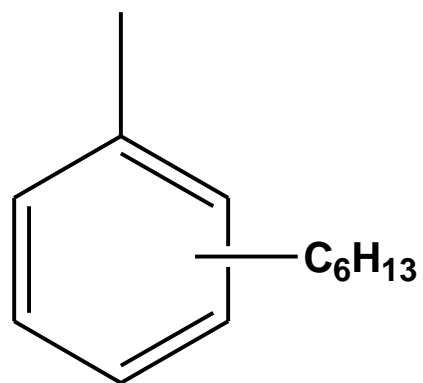

**hexyltoluene**

Figure S6: Retention time = 19.50 – 20.50 min

(Comments: 2-n-hexyl; 4-n-hexyl- and several isomers of C<sub>6</sub> on toluene)

(D)

(iv) Toluene + 2 x C<sub>4</sub>

(MW = 204)

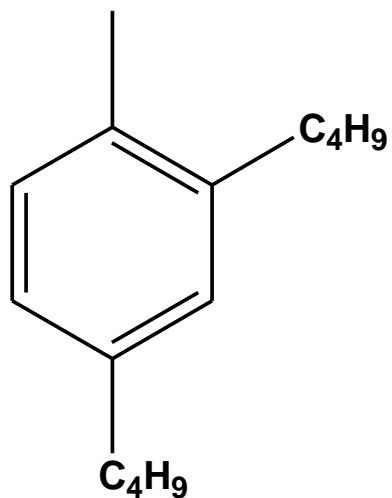

**2,4-dibutyltoluene**

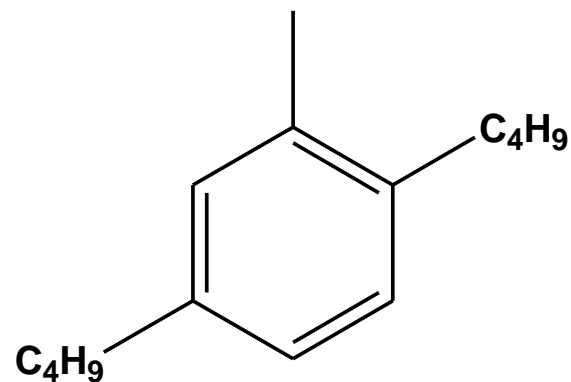

**2,5-dibutyltoluene**

Figure S7: Retention time = 21.20 – 23.70 min

(Comments: 2 x C<sub>4</sub> alkylation of toluene, with isomerization of C<sub>4</sub> chain)

(E)

(v) Toluene + C<sub>4</sub> + C<sub>6</sub>

(MW = 232)

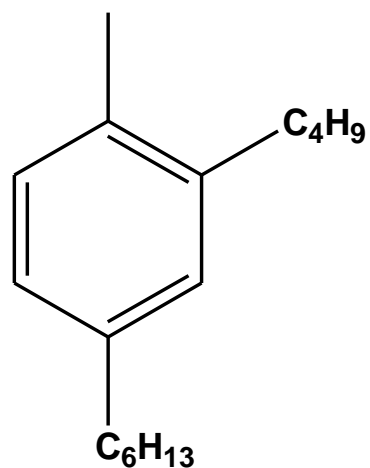

**2-ethyl-6-hexyltoluene**

Figure S8: Retention time = 22.90 – 24.30

(Comments: Unlikely to have 2 x C<sub>4</sub> + C<sub>2</sub>; sine there is very little of C<sub>2</sub> alkylation; hence most likely is C<sub>4</sub> + C<sub>6</sub>. Product as above, with isomers from the isomerization of the alkyl chain)



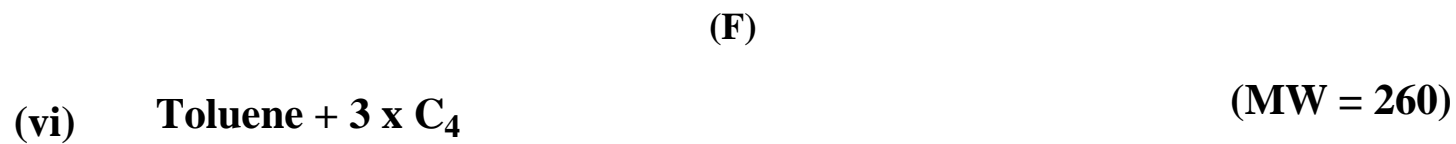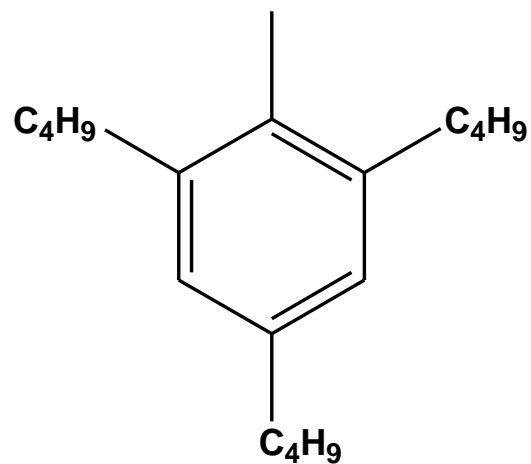

**2,4,6-tributyltoluene**

Figure S9: Retention time = 24.60

(Comments: Unlikely to have other combination since GC shows one dominant peak at this retention time)

(vii) Toluene + 2 x C<sub>4</sub> + C<sub>6</sub> (G) (MW = 288)

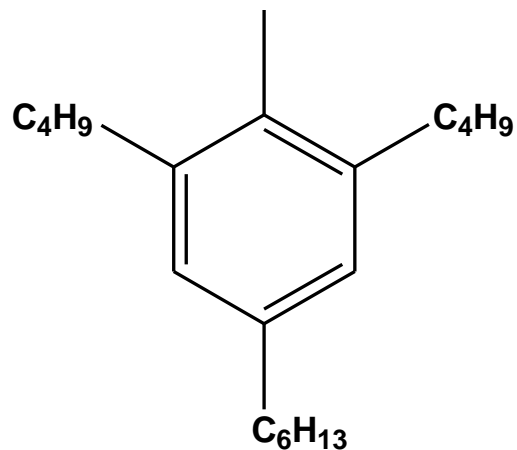

**2,6-dibutyl-4-hexyltoluene**

Figure S10: Retention time = 25.80 – 26.50 min

(Comments: Unlikely to be C<sub>8</sub> + C<sub>6</sub> alkylation of toluene since there is very little amount of C<sub>8</sub> formed in the hexane and no evidence of C<sub>8</sub> alkylation of toluene. Most likely is a 2 x C<sub>4</sub> + C<sub>6</sub> alkylation of toluene)
